# Supplementary material for: Staphylococcal superantigens promote bacterial persistence following postoperative surgical site infection
Source: bioRxiv or medRxiv preprint supplement (doi:10.1101/2024.07.23.24310826), 2024-07-24
Supplement: Supplementary file [file media-1.pdf]

## **SUPPLEMENTARY MATERIALS**

### **Staphylococcal superantigens promote bacterial persistence following postoperative surgical site infection**

Karine Dufresne<sup>1\*</sup>, Stephen W. Tuffs<sup>1,2\*</sup>, Nicholas R. Walton<sup>1</sup>, Katherine J. Kasper<sup>1</sup>, Ivor Mohorovic<sup>1</sup>, Farah Hasan<sup>1</sup>, Tracey Bentall<sup>3</sup>, David E. Heinrichs<sup>1</sup>, Johan Delpont<sup>4</sup>, Tina S. Mele<sup>3,5</sup>, John K. McCormick<sup>1</sup>

**Table S1. MLST and Spa typing for the *S. aureus* strains isolated from the same bacteremia patient.**

|          | <u>Allelic Profile</u> |             |             |            |            |            |              | <u>MLST</u> | <u>Spa</u> |
|----------|------------------------|-------------|-------------|------------|------------|------------|--------------|-------------|------------|
|          | <i>arcC</i>            | <i>aroE</i> | <i>glpF</i> | <i>gmK</i> | <i>pta</i> | <i>tpi</i> | <i>yquiL</i> |             |            |
| SAB-0429 | 1                      | 4           | 1           | 4          | 12         | 1          | 10           | ST5         | t002       |
| SAB-0485 | 1                      | 4           | 1           | 4          | 12         | 1          | 10           | ST5         | t002       |
| SAB-0495 | 1                      | 4           | 1           | 4          | 12         | 1          | 10           | ST5         | t002       |

**Table S2. Antibiotic resistance genes from genomic analyses for the *S. aureus* strains isolated from the same bacteremia patient..**

| <u>Gene</u>  | <u>AMR Gene Family</u>     | <u>% identity</u> |                 |                 |
|--------------|----------------------------|-------------------|-----------------|-----------------|
|              |                            | <u>SAB-0429</u>   | <u>SAB-0485</u> | <u>SAB-0495</u> |
| <i>mecR1</i> | Methicillin resistant PBP2 | 100               | 0               | 0               |
| <i>mecI</i>  | Methicillin resistant PBP2 | 100               | 0               | 0               |
| <i>mecA</i>  | Methicillin resistant PBP2 | 99.7              | 0               | 0               |
| <i>blaZ</i>  | $\beta$ -lactamase         | 0                 | 93.95           | 93.95           |

**Table S3. Proteomic analysis of the supernatants from the *S. aureus* strains isolated from the same bacteremia patient.**

| Spot #  | Predicted Size | Protein hit                                                           | P-value  |
|---------|----------------|-----------------------------------------------------------------------|----------|
| 0429-15 | 23949          | Thermonuclease [ <i>S. aureus</i> subsp. <i>aureus</i> CIG1750]       | 6,90E-08 |
| 0429-20 | 18358          | Alkyl hydroperoxide reductase, partial [ <i>S. aureus</i> ]           | 2,20E-05 |
| 0429-25 | 22375          | Superantigen-like protein (Sav0433) from <i>S. aureus</i> Mu50        | 6,90E-07 |
| 0429-28 | 32220          | Glycerophosphodiester phosphodiesterase, partial [ <i>S. aureus</i> ] | 2,20E-08 |
|         | 34968          | Gamma-hemolysin subunit A [ <i>S. aureus</i> ]                        | 1,40E-07 |
| 0429-35 | 34028          | Chain A, leukocidin F (Hlgb) from <i>S. aureus</i>                    | 5,50E-05 |
|         | 32090          | Pyridoxal biosynthesis protein [ <i>S. aureus</i> ]                   | 0,0035   |
|         | 31410          | Leukotoxin LukD [ <i>S. aureus</i> DAR5844]                           | 1,10E-08 |
|         | 27094          | Gamma-hemolysin protein B [ <i>S. aureus</i> ]                        | 2,80E-07 |
| 0429-70 | 71387          | Lipase [ <i>S. aureus</i> ]                                           | 1,70E-11 |
| 0485-15 | 25216          | Thermonuclease [ <i>S. aureus</i> ]                                   | 4,40E-08 |
| 0485-20 | 10311          | 50S ribosomal protein L6, partial [ <i>S. aureus</i> M0271]           | 0,00087  |
| 0485-25 | 30023          | Enterotoxin [ <i>S. aureus</i> ] (SER)                                | 1,40E-05 |
| 0485-28 | 32220          | Glycerophosphodiester phosphodiesterase [ <i>S. aureus</i> ]          | 6,90E-07 |
|         | 33115          | Chain B of octameric pore of gamma-hemolysin from <i>S. aureus</i>    | 5,50E-05 |
|         | 36389          | Leukotoxin Luke [ <i>S. aureus</i> LPIH6021]                          | 8,70E-06 |
|         | 36349          | Gamma-hemolysin component A [ <i>S. aureus</i> VRS2]                  | 0,00014  |
| 0485-30 | 34437          | Chain A, crystal structure of alpha-hemolysin                         | 4,40E-11 |
| 0485-35 | 34028          | Chain A, leukocidin F (Hlgb) from <i>S. aureus</i>                    | 1,40E-09 |
|         | 36429          | Gamma-hemolysin component B [ <i>S. aureus</i> CIG1835]               | 3,50E-09 |
|         | 31410          | Leukotoxin LukD [ <i>S. aureus</i> DAR5844]                           | 2,20E-08 |
|         | 35244          | Chain A, of octameric pore of gamma-hemolysin from <i>S. aureus</i>   | 3,50E-06 |
| 0485-70 | 76495          | Lipase [ <i>S. aureus</i> ]                                           | 8,70E-21 |
| 0495-15 | 23949          | <i>S. aureus</i> sub. sp. <i>aureus</i> thermonuclease                |          |
| 0495-20 | 12679          | <i>S. aureus</i> 50s ribosomal protein L6                             |          |
| 0495-25 | 30023          | Enterotoxin (SER)                                                     | 0,00011  |
| 0495-28 | 32220          | Glycerophosphodiester phosphodiesterase [ <i>S. aureus</i> ]          | 1,40E-10 |
|         | 33115          | Chain B of octameric pore form of gamma-hemolysin, <i>S. aureus</i>   | 2,20E-06 |
| 0495-30 | 34437          | Chain A of Alpha-Hemolysin                                            | 2,80E-08 |
| 0495-35 | 34028          | Chain A, leukocidin F (Hlgb) from <i>S. aureus</i>                    | 1,70E-05 |
|         | 36698          | Gamma-hemolysin subunit B [ <i>S. aureus</i> ]                        | 5,50E-05 |
|         | 34870          | Chain B, covalent S-f heterodimer of Gamma-hemolysin                  | 0,00069  |
|         | 31410          | Leukotoxin LukD [ <i>S. aureus</i> DAR5844]                           | 2,00E-03 |
|         | 35244          | Chain A, of octameric pore of gamma-hemolysin From <i>S. aureus</i>   | 9,10E-03 |
|         | 27094          | Gamma-hemolysin protein B [ <i>S. aureus</i> ]                        | 1,30E-02 |
| 0495-70 | 76486          | Lipase [ <i>S. aureus</i> ]                                           | 5,50E-14 |
